# Supplementary material for: Maternal Efficacy and Safety Outcomes in a Randomized, Controlled Trial Comparing Insulin Detemir With NPH Insulin in 310 Pregnant Women With Type 1 Diabetes
Source: PubMed Central journal article supplement — Diabetes Care. 2012 Sep 11;35(10):2012–7. doi: 10.2337/dc11-2264 (PMC3447831; doi:10.2337/dc11-2264), 2012-09-11

SUPPLEMENTARY DATA

**Further statistical analysis details**

Comparison of subjects who achieved target A1C  $\leq 6.0\%$  at both 24 and 36 gestational weeks (GWs) was made with logistic regression, using the same factors and covariates as for the primary endpoint. Superiority was tested. Analysis of fasting plasma glucose (FPG) at 24 and 36 GWs was made separately using a normal linear regression model with treatment, country, and pregnancy status at randomization as factors, and FPG at randomization and the FPG at randomization by pregnancy status at randomization interaction as covariates. Superiority was tested for FPG. Analysis of the 8-point self-monitored plasma glucose (SMPG) profiles at 24 GWs was made using a linear mixed model where time point (i.e., time of measurement during the day) was the repeated measurement within a subject. The fixed factors in the model were treatment, time point, country, time point by treatment interaction, and pregnancy status at randomization. An unstructured covariance matrix was applied. The individual profiles were tested to see if they were parallel (considered to exist if the interaction between time and treatment was non-significant), in which case the model was reduced by omitting the interaction term. . Analysis of 8-point SMPG at 36 GWs was made using the same model, except that a compound symmetry covariance matrix was applied (due to lack of convergence when using an unstructured covariance matrix).

**Supplementary Table 1.** Algorithm for titration of basal insulin dose

| Current basal dose               |               | Pre-pregnant or <20 GWs            | $\geq 20$ GWs                      |
|----------------------------------|---------------|------------------------------------|------------------------------------|
| FPG or pre-dinner plasma glucose |               | Adjustment (U)                     |                                    |
| <4.0 mmol/l                      | <72 mg/dl     | Reduce according to local practice | Reduce according to local practice |
| 4.0–6.0 mmol/l                   | 72–108 mg/dl  | 0                                  | 0                                  |
| 6.1–8.0 mmol/l                   | 109–144 mg/dl | +1                                 | +2                                 |
| >8.0 mmol/l                      | >144 mg/dl    | +2                                 | +4                                 |
|                                  |               |                                    |                                    |

Abbreviations: FPG = fasting plasma glucose; GW = gestational week; U = units

**Supplementary Table 2.** Algorithm for titration of bolus insulin dose

| Current bolus dose          |               | Pre-pregnant or <20 GWs            | $\geq 20$ GWs                      |
|-----------------------------|---------------|------------------------------------|------------------------------------|
| Postprandial plasma glucose |               | Adjustment (U)                     |                                    |
| <4.0 mmol/l                 | <72 mg/dl     | Reduce according to local practice | Reduce according to local practice |
| 4.0–7.0 mmol/l              | 72–126 mg/dl  | 0                                  | 0                                  |
| 7.1–10.0 mmol/l             | 127–180 mg/dl | +1                                 | +2                                 |
| >10.0 mmol/l                | >180 mg/dl    | +2                                 | +4                                 |
|                             |               |                                    |                                    |

Abbreviations: GW = gestational week; U = units

SUPPLEMENTARY DATA

**Supplementary Table 3.** Maternal serious adverse events. E=events; R=rate (per 100 patient-year).

| System organ class                                   | IDet |      |    |       | NPH  |      |    |      |
|------------------------------------------------------|------|------|----|-------|------|------|----|------|
|                                                      | N    | %    | E  | R     | N    | %    | E  | R    |
| All subjects                                         | 152  |      |    |       | 158  |      |    |      |
| Exposure (year)                                      | 82.4 |      |    |       | 86.3 |      |    |      |
| Events                                               | 61   | 40.1 | 94 | 114.1 | 49   | 31.0 | 76 | 88.1 |
| Pregnancy, puerperium and perinatal conditions       | 39   | 25.7 | 39 | 47.3  | 26   | 16.5 | 31 | 35.9 |
| Metabolism and nutrition disorders                   | 17   | 11.2 | 19 | 23.1  | 13   | 8.2  | 22 | 25.5 |
| Gastrointestinal disorders                           | 5    | 3.3  | 10 | 12.1  | 4    | 2.5  | 8  | 9.3  |
| Infections and infestations                          | 7    | 4.6  | 7  | 8.5   | 2    | 1.3  | 2  | 2.3  |
| Reproductive system and breast disorders             | 3    | 2.0  | 3  | 3.6   | 5    | 3.2  | 5  | 5.8  |
| Nervous system disorders                             | 4    | 2.6  | 4  | 4.9   | 2    | 1.3  | 2  | 2.3  |
| Vascular disorders                                   | 2    | 1.3  | 3  | 3.6   | 1    | 0.6  | 1  | 1.2  |
| Injury, poisoning and procedural complications       |      |      |    |       | 2    | 1.3  | 3  | 3.5  |
| Eye disorders                                        | 2    | 1.3  | 2  | 2.4   |      |      |    |      |
| General disorders and administration site conditions | 2    | 1.3  | 2  | 2.4   |      |      |    |      |
| Hepatobiliary disorders                              | 2    | 1.3  | 2  | 2.4   |      |      |    |      |
| Social circumstances                                 | 1    | 0.7  | 1  | 1.2   | 1    | 0.6  | 1  | 1.2  |
| Investigations                                       | 1    | 0.7  | 1  | 1.2   |      |      |    |      |
| Renal and urinary disorders                          | 1    | 0.7  | 1  | 1.2   |      |      |    |      |
| Skin and subcutaneous tissue disorders               |      |      |    |       | 1    | 0.6  | 1  | 1.2  |

Supplementary Figure 1. Patient flow diagram

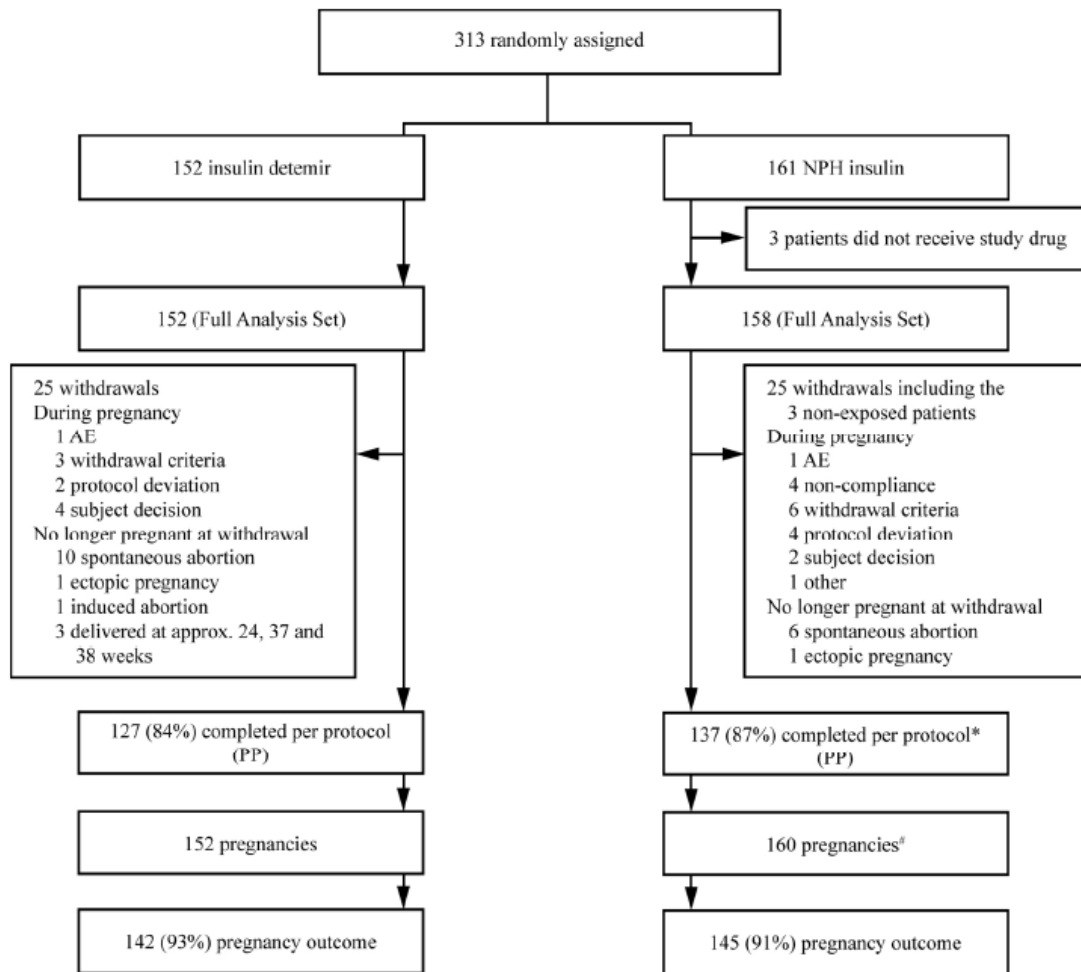

\*one non-completer was included in the PP analysis as withdrawal was after 32 weeks of pregnancy.

#two subjects stayed in the trial following spontaneous abortions.

SUPPLEMENTARY DATA

**Supplementary Figure 2.** Bolus insulin dose: mean ( $\pm$ SEM) during pregnancy and at follow-up. Abbreviations: NPH = neutral protamine Hagedorn; SEM, standard error of the mean. Key: Detemir = solid line; NPH = dotted line

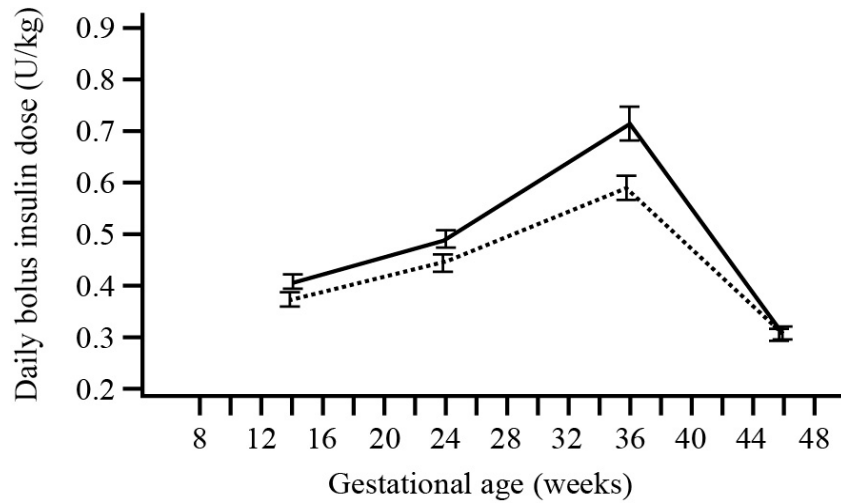

**Supplementary Figure 3.** Basal insulin dose: mean ( $\pm$ SEM) during pregnancy and at follow-up. Abbreviations: NPH = neutral protamine Hagedorn; SEM, standard error of the mean. Key: Detemir = solid line; NPH = dotted line

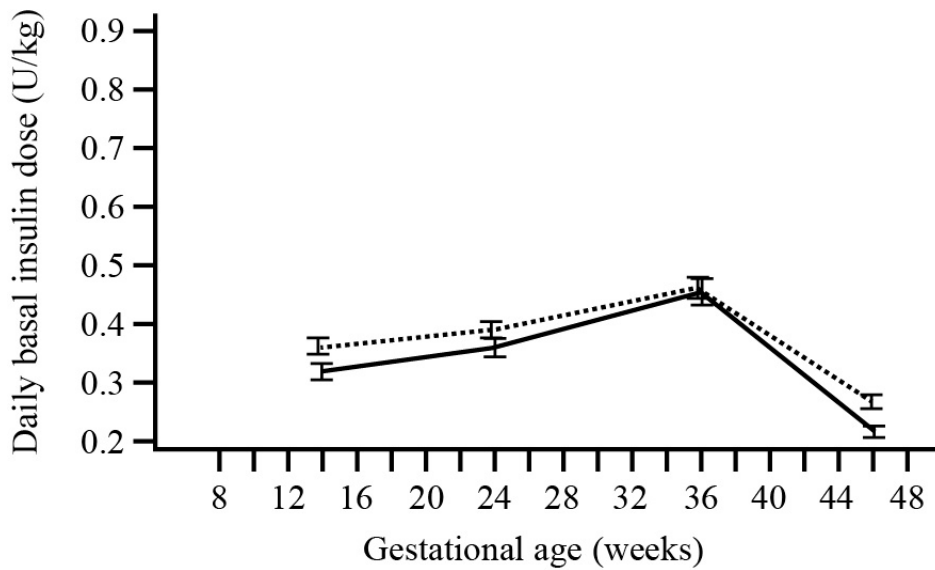

Supplement: supp_dc11-2264v112264_DC112264SupplementaryData.pdf [file supp_dc11-2264v112264_DC112264SupplementaryData.pdf]
